# Supplementary material for: A different wettable Janus material with universal floatability for anti-turnover and lossless transportation of crude oil
Source: Royal Society of Chemistry journal article supplement (doi:10.1039/c9nj03772a), 2019-01-01
Supplement: c9nj03772a7.pdf [file c9nj03772a7.pdf]

## Supporting Information

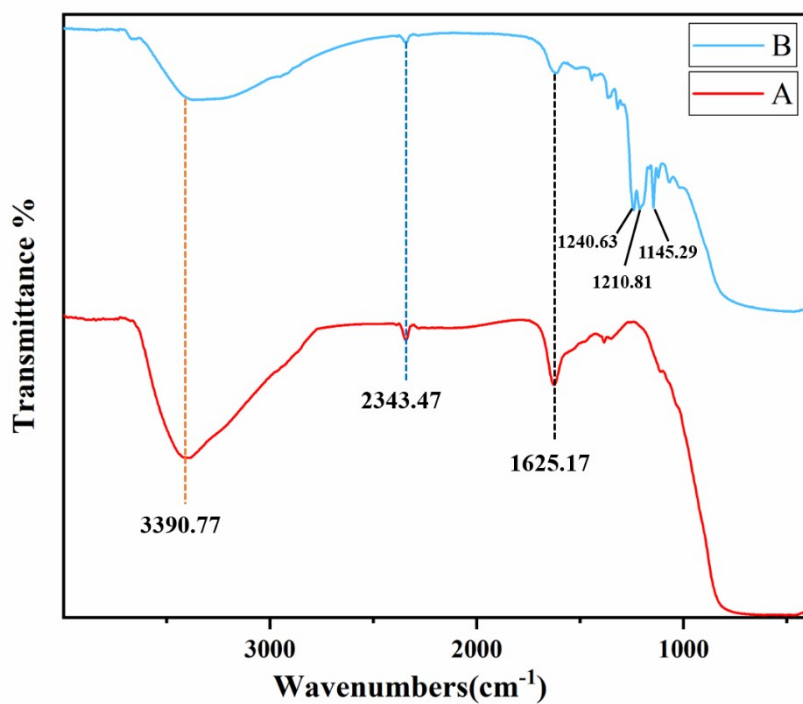

**Fig S1.** a) FT-IR spectra of the FOTS-TiO<sub>2</sub> particles.

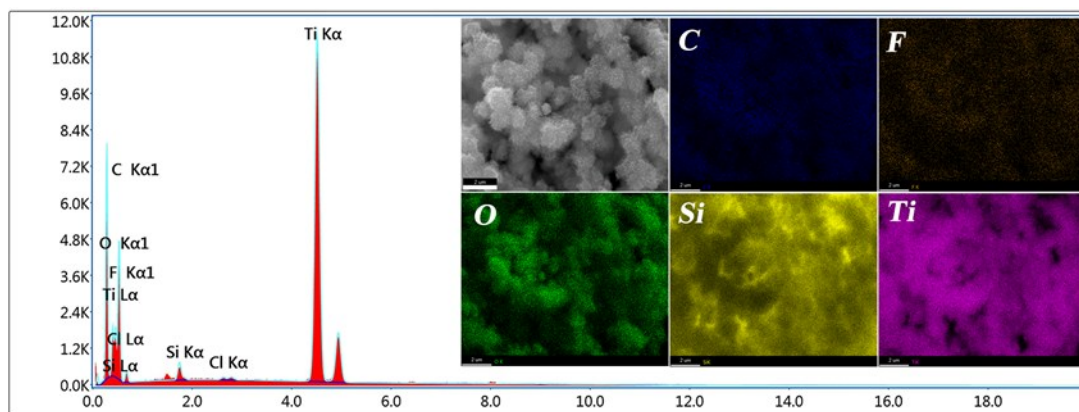

**Fig S2.** EDS spectra and C, F, O, Si, Ti distribution maps on the surface of SDTS.

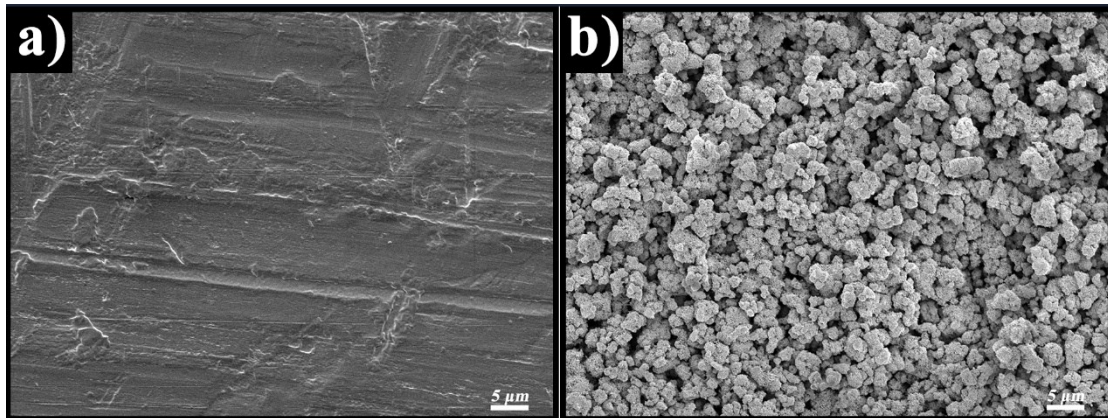

**Fig S3.** a) The SEM of the original copper sheet. b) The SEM of SDTS copper sheet.

| <b>Liquids</b> | <b>Surface energy (mN/m)<br/>(20 °C)</b> | <b>CAs on the surface of<br/>sample (°)</b> |
|----------------|------------------------------------------|---------------------------------------------|
| Water          | 72.1                                     | 161 ± 1                                     |
| Rapeseed oil   | 35.7                                     | 158 ± 1                                     |
| Glycerol       | 63.6                                     | 155 ± 2                                     |
| n-Hexadecane   | 25.7                                     | 152 ± 1                                     |
| Crude oil      | 35                                       | 150 ± 3                                     |

**Table S1.** The surface energy of various liquids and contact angles (CAs) on the surface of sample.

**Movie S1.** The process of the anti-fouling experiment.

**Movie S2.** The process of the anti-flipping experiment in different liquids (water, rapeseed oil, glycerol, n-hexadecane, crude oil).
